# Supplementary material for: Simple approach for ranking structure determining residues
Source: PeerJ. 2016 Jun 22;4:e2136. doi: 10.7717/peerj.2136 (PMC4924125; doi:10.7717/peerj.2136)
Supplement: File S1 — For each residue of the protein, the number of neighbors surrounding heavy atoms (C, O, N, S, P), in a distance of 5 Å was measured. Grade values were compared to experimental data. [file peerj-04-2136-s001.xlsx]

## Sheet: Grade 2CI2
						Guanidinium chloride denaturation
Protein 2CI2	Residue	Grade (Number of Neighbors)		Mutant 2CI2	Grade (Number of Neighbors)	m UF (kcal mol-1)	Cm (M)	ΔΔG° (kcal mol-1)	Reference
ASN	1	2		Wild Type (WT)	-	1.9	4	-	J. Mol. Biol. (1995) 254: 260-288
LEU	2	4		KA3	9	1.77	3.72	-0.53	ΔΔG = mWT*(CmMUT-CmWT)
LYS	3	9		KM3	9	1.88	3.66	-0.65
THR	4	7		TA4	7	1.83	3.56	-0.84
GLU	5	8		TV4	7	1.67	3.83	-0.32
TRP	6	16		TG4	7	1.95	3.4	-1.14
PRO	7	7		PA7	7	3.46	3.19	-1.54
GLU	8	9		EA8	9	1.75	3.76	-0.46
LEU	9	11		EQ8	9	1.91	3.68	-0.61
VAL	10	11		LA9	11	2.15	2.62	-2.622
GLY	11	7		KA12	11	1.52	4.22	0.42
LYS	12	11		SG13	10	2.1	3.59	-0.78
SER	13	10		SA13	10	1.86	3.54	-0.87
VAL	14	11		EQ15	7	1.87	3.85	-0.29
GLU	15	7		ED15	7	1.83	3.73	-0.51
GLU	16	8		EN15	7	2.01	3.64	-0.68
ALA	17	13		EQ16	8	1.84	3.76	-0.46
LYS	18	12		ED16	8	2.2	3.62	-0.72
LYS	19	8		EN16	8	2.18	3.45	-1.05
VAL	20	12		AG17	13	1.8	3.44	-1.06
ILE	21	16		KA18	12	1.73	3.75	-0.48
LEU	22	12		KG18	12	1.99	2.8	-2.28
GLN	23	8		KA19	8	1.61	4.11	0.21
ASP	24	9		KG19	8	1.73	3.49	-0.97
LYS	25	15		VA20	12	2.01	3.75	-0.48
PRO	26	7		IV21	16	1.99	3.33	-1.27
GLU	27	7		LA22	12	1.93	3.32	-1.29
ALA	28	9		LG22	12	1.68	3.29	-1.35
GLN	29	7		QA23	8	1.77	3.99	-0.02
ILE	30	9		QG23	8	1.81	3.69	-0.59
ILE	31	8		DA24	9	1.87	3.51	-0.93
VAL	32	7		KA25	15	1.57	3.67	-0.63
LEU	33	10		KG25	15	1.75	2.36	-3.12
PRO	34	7		PA26	7	2.07	3.09	-1.73
VAL	35	9		EA27	7	1.78	3.83	-0.32
GLY	36	6		IV30	9	1.99	3.43	-1.08
THR	37	7		IA30	9	2.07	1.99	-3.82
ILE	38	4		IV31	8	1.77	4.04	0.08
VAL	39	7		IA31	8	2.22	2.91	-2.07
THR	40	6		IG31	8	2.13	2.19	-3.44
MET	41	4		IT31	8	1.97	3.31	-1.31
GLU	42	7		LA32	7	2.11	2.78	-2.32
TYR	43	7		LI32	7	1.7	3.87	-0.25
ARG	44	7		LV32	7	1.76	3.74	-0.49
ILE	45	9		PA33	10	1.79	3.91	-0.17
ASP	46	9		VT34	7	1.65	3.47	-1.01
ARG	47	14		VA34	7	1.7	3.67	-0.63
VAL	48	15		VG34	7	2	2.75	-2.38
ARG	49	12		TS36	6	1.66	3.99	-0.02
LEU	50	14		TV36	6	1.67	3.61	-0.74
PHE	51	14		TA36	6	1.5	4.12	0.23
VAL	52	13		IA38	4	1.59	3.98	-0.04
ASP	53	8		VA39	7	2.14	3.24	-1.44
LYS	54	4		TA40	6	1.89	3.63	-0.7
LEU	55	4		TD40	6	1.87	4.01	0.02
ASP	56	10		EA42	7	1.78	3.64	-0.68
ASN	57	10		RA44	7	1.78	3.7	-0.57
ILE	58	16		DA46	14	1.83	3.59	-0.78
ALA	59	10		VA48	15	1.76	1.46	-4.83
GLU	60	8		LA50	14	1.98	2.02	-3.76
VAL	61	9		FL51	14	1.95	2.91	-2.07
PRO	62	15		FV51	14	2.24	2.77	-2.34
ARG	63	10		FA51	14	2.17	2.02	-3.76
VAL	64	13		VA52	13	2.15	2.98	-1.94
GLY	65	9		DA53	8	1.99	2.24	-3.34
				DN53	8	1.6	4	0
				ND57	10	1.8	3.38	-1.18
				NA57	10	1.79	3.57	-0.82
				IV58	16	1.82	4.1	0.19
				IA58	16	1.93	1.79	-4.2
				AG59	10	2.19	3.03	-1.84
				VT61	9	1.63	3.8	-0.38
				VA61	9	1.92	3.22	-1.48
				VG61	9	2.61	2.33	-3.17
				PA62	15	1.8	2.28	-3.27
				VT64	13	1.79	3.41	-1.12
				VA64	13	1.95	3.25	-1.43
				VG64	13	2.1	2.2	-3.42

## Sheet: Grade 2W0K
						Thermal denaturation
Protein 6aJL2	Residue	Grade (Number of Neighbors)		Mutant 6aJL2	Grade (Number of Neighbors)	Tm (K)	ΔH° (kcal mol-1)	ΔΔG° (kcal mol-1)	Reference
ASN	1	5		Wild Type (WT)	-	323.05	86.2	-	Biochem. Biophys. Res. Commun. (2014) 443: 495-499
PHE	2	10		Phe2Ser	10	316.95	73.6	-1.63	ΔΔG = (TmMUT-TmWT)*(ΔHWT/TmWT)
MET	3	8		Phe2Leu	10	318.85	76.1	-1.12
LEU	4	15		Phe2Pro	10	316.75	73.7	-1.68
THR	5	8		Phe2Trp	10	319.15	81.3	-1.04
GLN	6	16
PRO	7	9		Arg24Gly	17	317.35	77.2	-1.52	Proteins (2008) 72: 684-692
HIS	8	7
SER	9	6		Pro7Ser	9	316.15	79.5	-1.84	J. Mol. Biol. (2010) 396: 280-292
VAL	10	11		His8Pro	7	323.25	84.8	0.05
SER	11	7		His8Ser	7	322.65	84.4	-0.11
GLU	12	12
SER	13	8		Arg24His	17	312.95 ± 1.15	56.47 ± 5.65	-2.7	This work
PRO	14	8		Ile29Gly	15	309.53 ± 0.53	60.74 ± 2.55	-3.61
GLY	15	7		Tyr37Phe	13	322.90 ± 0.31	87.23 ± 3.06	-0.04
LYS	16	10		Gln6Asn	16	310.55 ± 0.30	10.39 ± 3.21	-3.34
THR	17	9
VAL	18	12
THR	19	9
ILE	20	14
SER	21	12
CYX	22	15
THR	23	11
ARG	24	17
SER	25	7
SER	26	7
GLY	27	6
SER	28	8
ILE	29	15
ALA	30	5
SER	31	6
ASN	32	12
TYR	33	9
VAL	34	14
GLN	35	13
TRP	36	22
TYR	37	13
GLN	38	15
GLN	39	11
ARG	40	10
PRO	41	4
GLY	42	4
SER	43	6
SER	44	7
PRO	45	7
THR	46	8
THR	47	10
VAL	48	14
ILE	49	16
TYR	50	12
GLU	51	8
ASP	52	13
ASN	53	7
GLN	54	8
ARG	55	11
PRO	56	9
SER	57	4
GLY	58	4
VAL	59	9
PRO	60	6
ASP	61	7
ARG	62	12
PHE	63	15
SER	64	9
GLY	65	11
SER	66	10
ILE	67	11
ASP	68	9
SER	69	7
SER	70	4
SER	71	6
ASN	72	14
SER	73	13
ALA	74	14
SER	75	13
LEU	76	16
THR	77	13
ILE	78	14
SER	79	10
GLY	80	9
LEU	81	15
LYS	82	9
THR	83	7
GLU	84	7
ASP	85	16
GLU	86	12
ALA	87	10
ASP	88	10
TYR	89	19
TYR	90	14
CYX	91	13
GLN	92	14
SER	93	14
TYR	94	13
ASP	95	10
SER	96	4
SER	97	4
ASN	98	7
HIS	99	7
VAL	100	7
VAL	101	13
PHE	102	10
GLY	103	10
GLY	104	7
GLY	105	9
THR	106	14
LYS	107	12
LEU	108	15
THR	109	8
VAL	110	11
LEU	111	6

## Sheet: Grade 1FTG
						Thermal denaturation
Protein 1FTG	Residue	Grade (Number of Neighbors)		Mutant 1FTG	Grade (Number of Neighbors)	Tm1 (K)	ΔH°1 (kcal mol-1)	ΔΔG°1 (kcal mol-1)	Tm2 (K)	DH°2 (kcal mol-1)	ΔΔG°2 (kcal mol-1)	Total ΔΔG° (kcal mol-1)	Reference
SER	1	10		Wild Type (WT)	-	312	22	-	326	60	-	-	J. Mol. Biol. (2004) 344: 223-237
LYS	2	7		E20K	9	309.3	32.7	-0.190385	331.2	66.2	0.957055	0.77	ΔΔG = (TmMUT-TmWT)*(ΔHWT/TmWT)
LYS	3	9		E40K	8	316.5	27	0.317308	332.5	59.6	1.19632	1.51	Total ΔΔG = ΔΔG1 + ΔΔG2
ILE	4	15		E72K	9	312.8	2	0.0564103	333.6	68.4	1.39877	1.46
GLY	5	11		D75K	7	314.8	28.3	0.197436	330	54.3	0.736196	0.93
LEU	6	13		D126K	6	320	21.8	0.564103	327.5	39.7	0.276074	0.84
PHE	7	16		D150K	5	305.8	25.1	-0.437179	326.9	48	0.165644	-0.27
TYR	8	15
GLY	9	13		WT	-	317.3	33.9	-	329	52.7	-	-	J. Mol. Biol. (2004) 344: 239-255
THR	10	11		L6A	13	305.5	28.7	-1.2607	319.1	23.8	-1.58581	-2.85	ΔΔG = (TmMUT-TmWT)*(ΔHWT/TmWT)
GLN	11	8		I22V	16	311	33	-0.673085	324.7	37.3	-0.688784	-1.36	Total ΔΔG = ΔΔG1 + ΔΔG2
THR	12	5		V31A	12	312.6	30.9	-0.502143	324.2	41.5	-0.768875	-1.27
GLY	13	7		D43A	11	317.7	34.1	0.0427356	329.6	49.5	0.0961094	0.14
LYS	14	12		I51V	16	313.2	31.2	-0.43804	324.3	38.8	-0.752857	-1.19
THR	15	15		I52V	14	315.9	39.8	-0.149575	324.9	54.5	-0.656748	-0.81
GLU	16	10		S71A	7	316.3	34.5	-0.106839	329.3	55	0.0480547	-0.06
SER	17	8		A84G	11	313.3	34.4	-0.427356	323.6	31.9	-0.864985	-1.29
VAL	18	14		N97A	10	314.9	28.6	-0.256413	328.3	48.7	-0.112128	-0.37
ALA	19	13		Q99A	16	322.5	52.7	0.555563	331.3	56.2	0.368419	0.92
GLU	20	9		I104V	11	313.3	29.5	-0.427356	327.9	54.5	-0.176201	-0.6
ILE	21	10		S110A	11	315.6	32.5	-0.181626	328.7	44.3	-0.0480547	-0.23
ILE	22	16		V117A	12	309.3	36.9	-0.854712	322.6	33.7	-1.02517	-1.88
ARG	23	12		T122S	10	323.2	35.5	0.63035	330.3	50.7	0.208237	0.84
ASP	24	7		V139A	15	310.9	29	-0.683769	327.5	50.8	-0.240274	-0.92
GLU	25	9		L143A	15	315.8	33.3	-0.160258	328.9	50	-0.0160182	-0.18
PHE	26	15		I156V	15	308.8	25.3	-0.908131	320.3	29.9	-1.39359	-2.3
GLY	27	9		V160A	13	309.1	27.7	-0.876079	322.4	49.2	-1.0572	-1.93
ASN	28	4
ASP	29	7
VAL	30	11
VAL	31	12
THR	32	11
LEU	33	10
HIS	34	10
ASP	35	10
VAL	36	12
SER	37	6
GLN	38	6
ALA	39	9
GLU	40	8
VAL	41	11
THR	42	6
ASP	43	11
LEU	44	15
ASN	45	9
ASP	46	7
TYR	47	15
GLN	48	9
TYR	49	9
LEU	50	15
ILE	51	16
ILE	52	14
GLY	53	11
CYS	54	16
PRO	55	12
THR	56	14
TRP	57	12
ASN	58	9
ILE	59	6
GLY	60	4
GLU	61	6
LEU	62	12
GLN	63	13
SER	64	6
ASP	65	11
TRP	66	16
GLU	67	10
GLY	68	8
LEU	69	13
TYR	70	12
SER	71	7
GLU	72	9
LEU	73	14
ASP	74	9
ASP	75	7
VAL	76	11
ASP	77	7
PHE	78	14
ASN	79	8
GLY	80	6
LYS	81	16
LEU	82	11
VAL	83	13
ALA	84	11
TYR	85	17
PHE	86	19
GLY	87	12
THR	88	13
GLY	89	12
ASP	90	13
GLN	91	14
ILE	92	8
GLY	93	5
TYR	94	13
ALA	95	11
ASP	96	8
ASN	97	10
PHE	98	20
GLN	99	16
ASP	100	13
ALA	101	10
ILE	102	18
GLY	103	12
ILE	104	11
LEU	105	16
GLU	106	14
GLU	107	10
LYS	108	11
ILE	109	14
SER	110	11
GLN	111	8
ARG	112	13
GLY	113	10
GLY	114	10
LYS	115	8
THR	116	10
VAL	117	12
GLY	118	12
TYR	119	14
TRP	120	16
SER	121	8
THR	122	10
ASP	123	4
GLY	124	7
TYR	125	15
ASP	126	6
PHE	127	11
ASN	128	7
ASP	129	11
SER	130	12
LYS	131	9
ALA	132	12
LEU	133	12
ARG	134	12
ASN	135	4
GLY	136	8
LYS	137	11
PHE	138	17
VAL	139	15
GLY	140	11
LEU	141	15
ALA	142	11
LEU	143	15
ASP	144	14
GLU	145	11
ASP	146	8
ASN	147	9
GLN	148	12
SER	149	8
ASP	150	5
LEU	151	8
THR	152	13
ASP	153	8
ASP	154	8
ARG	155	17
ILE	156	15
LYS	157	10
SER	158	9
TRP	159	20
VAL	160	13
ALA	161	9
GLN	162	11
LEU	163	14
LYS	164	12
SER	165	9
GLU	166	10
PHE	167	15
GLY	168	6
LEU	169	7

## Sheet: Grade 1ARR
							Thermal denaturation
Protein 1ARR	Residue	Chain	Grade (Number of Neighbors)		Mutant 1ARR	Grade (Number of Neighbors Chain A)	Tm (K)	ΔH° (kcal mol-1)	ΔΔG° (kcal mol-1)	Reference
MET	1	A	6		WT-st6	-	332.15	62.3	-	Nat. Struc. Biol (1994) 1: 518-523
LYS	2	A	4		PA8	10	347.25	80.2	2.83224	ΔΔG = (TmMUT-TmWT)*(ΔHWT/TmWT)
GLY	3	A	4		SA35	9	336.55	57.1	0.82529
MET	4	A	5		NA11	9	335.25	57.2	0.581454
SER	5	A	7		KA6	9	332.75	59	0.11254
LYS	6	A	9		RA16	9	332.65	60	0.0937829
MET	7	A	8		VA25	13	332.45	58.3	0.0562698
PRO	8	A	10		MA4	5	332.35	59.4	0.0375132
GLN	9	A	7		EA27	9	331.95	61.6	-0.0375132
PHE	10	A	13		KA2	4	331.85	57.2	-0.0562698
ASN	11	A	9		QA9	7	331.55	59.5	-0.11254
LEU	12	A	12		GA3	4	331.25	60	-0.168809
ARG	13	A	9		MA1	6	331.15	59.7	-0.187566
TRP	14	A	16		SA5	7	330.65	53.3	-0.281349
PRO	15	A	10		RA13	9	330.45	51.3	-0.318862
ARG	16	A	9		EA17	7	330.15	62.1	-0.375132
GLU	17	A	7		VA18	12	330.05	63.1	-0.393888
VAL	18	A	12		EA43	10	329.25	59.4	-0.543941
LEU	19	A	12		MA7	8	328.65	52.6	-0.656481
ASP	20	A	8		DA20	8	328.45	56.9	-0.693994
LEU	21	A	10		LA19	12	321.45	48.7	-2.00695
VAL	22	A	15		FA10	13	313.75	34.8	-3.45121
ARG	23	A	11
LYS	24	A	9		WT-st11	-	331.05	58.5	-	Nat. Struc. Biol (1994) 1: 518-523
VAL	25	A	13		NA34	9	336.15	57.1	0.901223	ΔΔG = (TmMUT-TmWT)*(ΔHWT/TmWT)
ALA	26	A	13		QA39	9	334.55	61.6	0.618487
GLU	27	A	9		GA52	8	334.05	57.7	0.530131
GLU	28	A	9		KA46	6	330.25	52.9	-0.141368
ASN	29	A	10		RA23	11	329.85	56.5	-0.212053
GLY	30	A	7		KA24	9	329.45	59.9	-0.282737
ARG	31	A	10		EA28	9	328.85	52.1	-0.388763
SER	32	A	7		IA51	13	324.05	47.4	-1.23697
VAL	33	A	10		GA49	7	321.85	45.8	-1.62574
ASN	34	A	9		GA30	7	321.05	48.8	-1.7671
SER	35	A	9		RA50	11	321.05	41.9	-1.7671
GLU	36	A	15		KA47	9	320.35	41.2	-1.8908
ILE	37	A	16		PA15	10	319.75	38.1	-1.99683
TYR	38	A	12		SA44	12	319.45	41	-2.04984
GLN	39	A	9		NA29	10	318.45	44.2	-2.22655
ARG	40	A	16		VA33	10	317.25	39.7	-2.4386
VAL	41	A	14		EA48	10	316.35	29.3	-2.59764
MET	42	A	10		LA12	12	315.45	40.4	-2.75668
GLU	43	A	10		LA21	10	312.75	36.7	-3.2338
SER	44	A	12		RA31	10	310.25	34.2	-3.67558
PHE	45	A	13		MA42	10	308.75	26.1	-3.94064
LYS	46	A	6		SA32	7	306.65	24.4	-4.31174
LYS	47	A	9		YA38	12	306.15	24.1	-4.40009
GLU	48	A	10		WA14	16	304.65	25.3	-4.66516
GLY	49	A	7		RA40	16	304.35	13.6	-4.71817
ARG	50	A	11		VA22	9	UNF	-	-
ILE	51	A	13		EA36	15	UNF	-	-
GLY	52	A	8		IA37	16	UNF	-	-
ALA	53	A	7		VA41	14	UNF	-	-
MET	54	B	5		FA45	13	UNF	-	-
LYS	55	B	4
GLY	56	B	4
MET	57	B	5
SER	58	B	6
LYS	59	B	9
MET	60	B	8
PRO	61	B	10
GLN	62	B	7
PHE	63	B	11
ASN	64	B	8
LEU	65	B	11
ARG	66	B	9
TRP	67	B	16
PRO	68	B	10
ARG	69	B	12
GLU	70	B	8
VAL	71	B	11
LEU	72	B	11
ASP	73	B	8
LEU	74	B	11
VAL	75	B	16
ARG	76	B	11
LYS	77	B	8
VAL	78	B	14
ALA	79	B	13
GLU	80	B	9
GLU	81	B	11
ASN	82	B	11
GLY	83	B	7
ARG	84	B	12
SER	85	B	7
VAL	86	B	12
ASN	87	B	10
SER	88	B	9
GLU	89	B	16
ILE	90	B	16
TYR	91	B	12
GLN	92	B	9
ARG	93	B	18
VAL	94	B	13
MET	95	B	10
FLU	96	B	10
SER	97	B	12
PHE	98	B	13
LYS	99	B	6
LYS	100	B	10
GLU	101	B	7
GLY	102	B	6
ARG	103	B	10
ILE	104	B	13
GLY	105	B	6
ALA	106	B	5

## Sheet: Grade 1HCQ
							Dimer recognizing
Protein 1HCQ	Residue	Chain	Grade (Number of Neighbors)		Mutant 1HCQ	Grade (Number of Neighbors Chain A)	Kd (nM)	Kd Difference (%)	Reference
MET	1	A	2		Wild Type (WT)	-	43	-	Biochemistry (2010) 49: 5978-5988
LYS	2	A	8		D12A	10	67	-56	Kd Difference = (KdWT-KdMUT)/KdWT*100
GLU	3	A	10		H18A	4	190	-342
THR	4	A	11		E25A	5	172	-300
ARG	5	A	9		S15A	7	102	-137
TYR	6	A	6		Y19A	2	316	-635
CYS	7	A	5		S23A	9	119	-177
ALA	8	A	5		K28A	5	313	-628
VAL	9	A	5		K32A	10	326	-658
CYS	10	A	5		R33A	7	745	-1633
ASN	11	A	7
ASP	12	A	10
TYR	13	A	13
ALA	14	A	10
SER	15	A	7
GLY	16	A	6
TYR	17	A	5
HIS	18	A	4
TYR	19	A	2
GLY	20	A	8
VAL	21	A	10
TRP	22	A	9
SER	23	A	9
CYS	24	A	6
GLU	25	A	5
GLY	26	A	5
CYS	27	A	5
LYS	28	A	5
ALA	29	A	7
PHE	30	A	11
PHE	31	A	12
LYS	32	A	10
ARG	33	A	7
SER	34	A	7
ILE	35	A	5
GLN	36	A	4
GLY	37	A	2
HIS	38	A	5
ASN	39	A	4
ASP	40	A	5
TYR	41	A	9
MET	42	A	10
CYS	43	A	13
PRO	44	A	10
ALA	45	A	11
THR	46	A	11
ASN	47	A	7
GLN	48	A	10
CYS	49	A	10
THR	50	A	10
ILE	51	A	10
ASP	52	A	8
LYS	53	A	10
ASN	54	A	14
ARG	55	A	14
ARG	56	A	6
LYS	57	A	11
SER	58	A	13
CYS	59	A	15
GLN	60	A	15
ALA	61	A	15
CYS	62	A	11
ARG	63	A	16
LEU	64	A	17
ARG	65	A	11
LYS	66	A	15
CYS	67	A	16
TYR	68	A	14
GLU	69	A	13
VAL	70	A	11
GLY	71	A	10
MET	72	A	8
MET	73	A	6
LYS	74	A	4
MET	75	B	7
LYS	76	B	4
GLU	77	B	11
THR	78	B	10
ARG	79	B	12
TYR	80	B	13
CYS	81	B	7
ALA	82	B	5
VAL	83	B	8
CYS	84	B	7
ASN	85	B	12
ASP	86	B	6
TYR	87	B	12
ALA	88	B	7
SER	89	B	8
GLY	90	B	7
TYR	91	B	13
HIS	92	B	16
TYR	93	B	10
GLY	94	B	10
VAL	95	B	14
TRP	96	B	12
SER	97	B	10
CYX	98	B	12
GLU	99	B	18
GLY	100	B	14
CYX	101	B	11
LYS	102	B	12
ALA	103	B	13
PHE	104	B	10
PHE	105	B	7
LYS	106	B	9
ARG	107	B	9
SER	108	B	14
ILE	109	B	5
GLN	110	B	5
GLY	111	B	3
HIS	112	B	4
ASN	113	B	4
ASP	114	B	6
TYR	115	B	9
MET	116	B	9
CYS	117	B	13
PRO	118	B	10
ALA	119	B	12
THR	120	B	11
ASN	121	B	8
GLN	122	B	10
CYS	123	B	10
THR	124	B	10
ILE	125	B	9
ASP	126	B	8
LYS	127	B	10
ASN	128	B	14
ARG	129	B	14
ARG	130	B	7
LYS	131	B	11
SER	132	B	13
CYS	133	B	15
GLN	134	B	15
ALA	135	B	14
CYS	136	B	11
ARG	137	B	16
LEU	138	B	17
ARG	139	B	11
LYS	140	B	15
CYS	141	B	16
TYR	142	B	14
GLU	143	B	12
VAL	144	B	11
GLY	145	B	8
MET	146	B	7
MET	147	B	6
LYS	148	B	7
DC	149	C	4
DC	150	C	4
DA	151	C	10
DG	152	C	9
DG	153	C	12
DT	154	C	13
DC	155	C	8
DA	156	C	5
DC	157	C	8
DA	158	C	7
DG	159	C	12
DT	160	C	7
DG	161	C	12
DA	162	C	7
DC	163	C	9
DC	164	C	7
DT	165	C	12
DG	166	C	18
DC	167	D	10
DC	168	D	10
DA	169	D	14
DG	170	D	13
DG	171	D	10
DT	172	D	13
DC	173	D	18
DA	174	D	13
DC	175	D	12
DT	176	D	12
DG	177	D	14
DT	178	D	10
DG	179	D	6
DA	180	D	9
DC	181	D	8
DC	182	D	13
DT	183	D	6
DG	184	D	4

## Sheet: Grade Csp BS
						Thermal denaturation
Protein 1CSP	Residue	Grade (Number of Neighbors)		Protein 1CSP	Grade (Number of Neighbors)	Tm (K)	ΔH° (kcal mol-1)	ΔΔG° (kcal mol-1)	Reference
MET	1	7		Csp S WT	-	53.6	46.1281	-	JMB (2001) 313, 343-357
LEU	2	10		E3R	13	69.6	52.3423	2.26
GLU	3	13		E3L	13	62.7	47.8011	1.28
GLY	4	12		A46E	11	48.6	39.675	-0.71
LYS	5	11		E66L	8	66.4	53.5373	1.81
VAL	6	14
LYS	7	9		Csp S WT	-	53.8	46.1281	-	JMB (2005) 347, 1063-1076
TRP	8	8		E3K	13	70.4	48.5182	2.34
PHE	9	16		K65I	11	62.4	48.0402	1.21
ASN	10	8		E66K	8	66.7	54.0153	1.82
SER	11	7		E43S	7	54.7	44.4551	0.13
GLU	12	4		A46K	11	62.2	51.6252	1.19
LYS	13	6
GLY	14	10		Csp S WT	-	52.3	39.1969	-	JMB (2007) 366, 842-856
PHE	15	11		E3R	13	70.2	50.1912	2.16
GLY	16	10		E3Q	13	62.6	46.6061	1.24
PHE	17	12		K7E	9	UNF	-	-
ILE	18	17		K7Q	9	UNF	-	-
GLU	19	11		N10D	8	57.7	43.26	0.65
VAL	20	12		D25Q	8	44.2	29.1587	-0.98
GLU	21	5		S48E	12	53	38.0019	0.08
GLY	22	4		E50Q	10	42.6	34.1778	-1.17
GLN	23	7		R56Q	4	55.3	42.543	0.36
ASP	24	6
ASP	25	8		Csp S WT*	-	55.3	38.2409	-	JMB (2007) 366, 842-856
VAL	26	13		E3R*	13	71.6	49.9522	1.9
PHE	27	11		K5E*	11	22.2	14.5793	-3.85
VAL	28	15		K5Q*	11	38.6	29.8757	-1.94
HIS	29	10		N10K*	8	41.1	27.4857	-1.65
PHE	30	10		E12K**	4	50.2	37.7629	-0.59
SER	31	5		K13E*	6	52.7	36.5679	-0.3
ALA	32	10		K13Q*	6	54	41.348	-0.15
ILE	33	13		E19K*	11	50.5	37.2849	-0.56
GLN	34	9		E19Q*	11	53.7	39.914	-0.19
GLY	35	5		V20Q*	12	39.5	29.6367	-1.84
GLU	36	4		V20E*	12	UNF	-	-
GLY	37	4		V20K*	12	37.2	25.8126	-2.11
PHE	38	5		E21K*	5	54.3	43.26	-0.12
LYS	39	8		E21Q*	5	52.5	34.8948	-0.33
THR	40	8		D24K*	6	50.9	34.1778	-0.51
LEU	41	12		D24N*	6	48.4	31.0707	-0.8
GLU	42	7		D25K*	8	35	13.3843	-2.36
GLU	43	7		K39E*	8	52.8	35.8509	-0.29
GLY	44	6		K39Q*	8	54.9	35.3728	-0.05
GLN	45	11		E42K*	7	55.3	42.782	0
ALA	46	11		E42Q*	7	54.1	35.6119	-0.14
VAL	47	15		E43K*	7	56.5	46.1281	0.14
SER	48	12		S48K*	12	61.6	41.587	0.73
PHE	49	15		E50K*	10	49.7	31.5488	-0.65
GLU	50	10		E53K*	6	53.7	40.153	-0.19
ILE	51	12		E53Q*	6	56.6	43.738	0.15
VAL	52	8		N55K*	4	54.3	37.7629	-0.12
GLU	53	6		N55D*	4	59.2	44.2161	0.45
GLY	54	5		K56E*	4	38.2	24.1396	-1.99
ASN	55	4		K65Q*	11	48	31.3098	-0.85
ARG	56	4
GLY	57	7
PRO	58	8
GLN	59	10
ALA	60	13
ALA	61	9
ASN	62	10
VAL	63	14
THR	64	9
LYS	65	11
GLU	66	8
ALA	67	4

## Sheet: Grade Csp BC
						Thermal denaturation
Protein 1C9O	Residue	Grade (Number of Neighbors)		Protein 1C9O	Grade (Number of Neighbors)	Tm (K)	ΔH° (kcal mol-1)	ΔΔG° (kcal mol-1)	Reference
MET	1	6		Csp C WT	-	76.9	58.5564	-	JMB (2001) 313, 343-357
GLN	2	8		Q2L	8	80.9	57.8394	0.66912
ARG	3	10		R3E	10	59.1	45.6501	-2.97759
GLY	4	11		R3L	10	70.9	55.6883	-1.00368
LYS	5	12		R3K	10	76.1	53.5373	-0.133824
VAL	6	15		R3A	10	64.9	51.3862	-2.00736
LYS	7	9		N11S	8	79.2	58.7954	0.384744
TRP	8	8		Y15S	11	76.7	56.6444	-0.033456
PHE	9	16		E21A	5	75	57.8394	-0.317832
ASN	10	8		G23Q	5	74.7	59.5124	-0.368016
ASN	11	8		S24D	6	77.8	61.6635	0.150552
GLU	12	4		T31S	4	77.8	59.7514	0.150552
LYS	13	5		E46A	11	75.4	57.6004	-0.25092
GLY	14	10		Q53E	7	76.1	58.7954	-0.133824
TYR	15	11		V64T	8	75.1	58.3174	-0.301104
GLY	16	10		L66E	7	68.9	50.1912	-1.33824
PHE	17	12
ILE	18	17		Csp C WT	-	76.9	58.5564	-	Prot Eng Des Sel (2006) 19, 355-358
GLU	19	9		R56E	4	80	60.9465	0.518568
VAL	20	12		H29E	9	73.5	105.88	-0.568752
GLU	21	5		E46K	11	74	106.836	-0.485112
GLY	22	4		E21K	5	75.4	48.9962	-0.25092
GLY	23	5		N55K	4	77.7	55.2103	0.133824
SER	24	6		E36K	5	76	45.6501	-0.150552
ASP	25	9		E50K	9	73.5	43.26	-0.568752
VAL	26	12		E12K	4	74.4	52.3423	-0.4182
PHE	27	11
VAL	28	15
HIS	29	9
PHE	30	9
THR	31	4
ALA	32	10
ILE	33	13
GLN	34	8
GLY	35	5
GLU	36	5
GLY	37	4
PHE	38	6
LYS	39	11
THR	40	8
LEU	41	12
GLU	42	7
GLU	43	7
GLY	44	6
GLN	45	11
GLU	46	11
VAL	47	15
SER	48	11
PHE	49	15
GLU	50	9
ILE	51	10
VAL	52	9
GLN	53	7
GLY	54	7
ASN	55	4
ARG	56	4
GLY	57	7
PRO	58	9
GLN	59	11
ALA	60	14
ALA	61	9
ASN	62	10
VAL	63	14
VAL	64	8
LYS	65	10
LEU	66	7
