# Supplementary material for: Simple approach for ranking structure determining residues
Source: PeerJ. 2016 Jun 22;4:e2136. doi: 10.7717/peerj.2136 (PMC4924125; doi:10.7717/peerj.2136)
Supplement: File S2 — Detailed information of circular biplots indicating the position of each mutation of its respective protein is shown. In Dim1 (abscissa) SDRI scores were represented and in Dim2 (ordinate) thermodynamic data. Variables shown as blue vectors represent the association between both variables. All plots show a positive association. (A) Chymotrypsin inhibitor; (B) 6aJL2; (C) apoflavodoxin; (D) arc repressor; (E) DNA-binding domain of the estrogen receptor α; (F) cold shock protein from B. subtilis; (G) cold shock protein from B. caldolyticus; and (H) the JAK interaction region of SOCS5. [file peerj-04-2136-s002.xlsx]

## Sheet: 2CI2
Protein 2CI2		Solvent Access	Dynamical entropy	Movement restriction	SDRI	Residue ranking position
Residue		% RSA	Hi	RMSF (Å)	Hi*RMSFi-1
ASN	1	100	0.156847	3.4641	0.0452779	65
LEU	2	72.9	0.172643	2.20467	0.0783077	62
LYS	3	36.5	0.216652	0.885987	0.244531	38
THR	4	39.8	0.213451	0.787688	0.270985	34
GLU	5	42	0.220773	0.942674	0.234199	44
TRP	6	0	0.267428	0.500931	0.533862	3
PRO	7	47.2	0.209856	0.629941	0.333136	22
GLU	8	46.9	0.209799	0.878362	0.238852	41
LEU	9	1.7	0.250722	0.530369	0.472731	5
VAL	10	45.2	0.223803	0.614202	0.36438	17
GLY	11	56.7	0.187372	0.61124	0.306543	26
LYS	12	36	0.224943	0.900284	0.249858	37
SER	13	100	0.208619	0.686911	0.303706	27
VAL	14	8.5	0.240083	0.732576	0.327725	23
GLU	15	54.3	0.202567	1.10666	0.183043	48
GLU	16	52.2	0.200353	1.12106	0.178717	49
ALA	17	0	0.23096	0.647795	0.356533	19
LYS	18	43.4	0.236694	0.975456	0.242649	40
LYS	19	63.1	0.207665	1.19606	0.173624	50
VAL	20	34.8	0.223591	0.645602	0.346329	21
ILE	21	0	0.259955	0.481237	0.540181	2
LEU	22	44.1	0.223448	0.713372	0.313229	25
GLN	23	78.4	0.18824	1.24069	0.151722	52
ASP	24	42.5	0.203964	0.694989	0.293478	29
LYS	25	5.5	0.235627	0.560111	0.420679	9
PRO	26	70.7	0.189079	0.678232	0.278782	33
GLU	27	49.5	0.201253	0.767756	0.262132	35
ALA	28	9.6	0.216117	0.572255	0.377658	14
GLN	29	57.8	0.21904	0.99329	0.22052	46
ILE	30	25	0.248461	0.670782	0.370406	16
ILE	31	41.2	0.242857	0.674715	0.35994	18
VAL	32	47.6	0.232195	0.624088	0.372054	15
LEU	33	20.9	0.241693	0.842992	0.286709	31
PRO	34	52.3	0.207017	0.731049	0.283178	32
VAL	35	51.9	0.209009	0.928864	0.225016	45
GLY	36	79.8	0.164414	1.28707	0.127743	55
THR	37	40.3	0.187394	2.03244	0.0922016	59
ILE	38	93.1	0.173853	2.04345	0.085078	61
VAL	39	41.8	0.19155	1.52452	0.125647	56
THR	40	69.5	0.166375	1.83427	0.0907037	60
MET	41	98.9	0.155279	2.14365	0.0724365	63
GLU	42	50.3	0.177569	1.60164	0.110867	57
TYR	43	68.3	0.197301	1.26655	0.155778	51
ARG	44	45.5	0.216735	0.907642	0.238789	42
ILE	45	60.5	0.198845	1.00585	0.19769	47
ASP	46	23.1	0.206713	0.821642	0.251585	36
ARG	47	14.6	0.250766	0.611242	0.410257	10
VAL	48	0	0.264832	0.592991	0.446604	6
ARG	49	19.2	0.259197	0.660037	0.392701	12
LEU	50	0.3	0.276046	0.715113	0.386017	13
PHE	51	16.8	0.262308	0.869964	0.301516	28
VAL	52	9.5	0.239433	0.555668	0.430892	8
ASP	53	39.9	0.19741	1.32216	0.149309	53
LYS	54	95.6	0.178431	1.75818	0.101486	58
LEU	55	77.7	0.184233	3.04666	0.0604704	64
ASP	56	47.5	0.200304	1.52726	0.131153	54
ASN	57	27.6	0.213761	0.901104	0.237221	43
ILE	58	2.4	0.261248	0.495239	0.527519	4
ALA	59	44	0.209703	0.59952	0.349785	20
GLU	60	39.7	0.231551	0.79175	0.292455	30
VAL	61	27.9	0.241623	0.549471	0.439737	7
PRO	62	1.3	0.260798	0.478289	0.545272	1
ARG	63	47.3	0.250228	0.794392	0.314993	24
VAL	64	18	0.237225	0.582327	0.407374	11
GLY	65	8.2	0.207016	0.846679	0.244503	39

## Sheet: 2W0K
Protein 2W0K		Solvent Access	Dynamical entropy	Movement restriction	SDRI	Residue ranking position
Residue		% RSA	Hi	RMSF (Å)	Hi*RMSFi-1
ASN	1	86.5	0.143015	1.5931	0.0897721	110
PHE	2	6.7	0.189809	0.683133	0.277851	44
MET	3	62.5	0.17906	0.973604	0.183915	80
LEU	4	9.4	0.216992	0.538219	0.403166	16
THR	5	54.7	0.193305	0.495146	0.3904	18
GLN	6	12.2	0.221778	0.438723	0.505508	6
PRO	7	37.7	0.195938	0.515697	0.379948	20
HIS	8	79.3	0.176044	1.55908	0.112916	102
SER	9	100	0.173074	0.712207	0.24301	55
VAL	10	17	0.19917	0.756021	0.263445	48
SER	11	100	0.166674	0.745061	0.223705	63
GLU	12	28.7	0.173678	0.714488	0.243081	54
SER	13	100	0.154584	0.72398	0.21352	69
PRO	14	46.8	0.154994	0.664715	0.233174	57
GLY	15	55.2	0.143283	0.621794	0.230435	60
LYS	16	53.9	0.167606	0.990561	0.169203	82
THR	17	47.1	0.178681	0.805948	0.221703	64
VAL	18	5.7	0.205037	0.566813	0.361736	25
THR	19	52.1	0.20015	0.615972	0.324934	33
ILE	20	0.7	0.234618	0.557735	0.420661	15
SER	21	100	0.204415	0.586895	0.348299	27
CYX	22	0.5	0.221705	0.4072	0.544463	4
THR	23	37.4	0.201174	0.499611	0.402662	17
ARG	24	10.1	0.203375	0.621325	0.327324	31
SER	25	100	0.162122	1.1702	0.138542	93
SER	26	100	0.149907	1.63187	0.0918623	109
GLY	27	57.1	0.149472	1.10631	0.135108	95
SER	28	100	0.165731	1.22922	0.134826	96
ILE	29	2.2	0.210302	1.0223	0.205714	73
ALA	30	64.4	0.166281	1.24768	0.133272	97
SER	31	100	0.162151	1.08579	0.149339	87
ASN	32	22.3	0.196034	0.641613	0.305533	37
TYR	33	47.7	0.190819	0.884558	0.215722	67
VAL	34	1.8	0.221877	0.495551	0.447737	13
GLN	35	8.7	0.218004	1.0346	0.210713	70
TRP	36	0.6	0.257466	0.422108	0.609954	1
TYR	37	16.9	0.220503	0.688276	0.32037	34
GLN	38	14.1	0.215992	0.554412	0.389587	19
GLN	39	23.9	0.195252	0.865283	0.225651	61
ARG	40	37.3	0.189179	1.36987	0.1381	94
PRO	41	87.1	0.158986	1.26653	0.125529	100
GLY	42	100	0.128674	1.38754	0.0927352	107
SER	43	100	0.152098	1.14631	0.132685	98
SER	44	100	0.152782	1.02444	0.149137	88
PRO	45	46.8	0.175228	0.758705	0.230956	59
THR	46	44.5	0.189394	0.629505	0.300862	38
THR	47	33.9	0.197568	0.678654	0.291118	39
VAL	48	3.2	0.221886	0.477447	0.464734	10
ILE	49	0	0.228043	0.472325	0.48281	9
TYR	50	37	0.19744	0.948319	0.2082	72
GLU	51	41.8	0.179583	1.09504	0.163996	83
ASP	52	19.9	0.195539	0.939015	0.208238	71
ASN	53	49.7	0.187523	0.836482	0.224181	62
GLN	54	42.3	0.183249	1.00199	0.182885	81
ARG	55	39.3	0.193361	0.87636	0.220641	65
PRO	56	21.7	0.180678	0.718553	0.251446	51
SER	57	100	0.147202	1.309	0.112454	103
GLY	58	91.7	0.142747	0.92169	0.154875	86
VAL	59	20.1	0.188143	0.649211	0.289802	40
PRO	60	34.7	0.176478	0.673309	0.262105	49
ASP	61	71	0.159568	0.85902	0.185756	78
ARG	62	12.4	0.200405	0.527596	0.379845	21
PHE	63	2.9	0.221437	0.720753	0.30723	36
SER	64	100	0.195597	0.569066	0.343716	29
GLY	65	17.5	0.187482	0.515842	0.363449	24
SER	66	100	0.193556	0.701596	0.275879	46
ILE	67	34.5	0.205477	0.713569	0.287957	41
ASP	68	39.4	0.174482	1.08902	0.160219	84
SER	69	100	0.152409	1.1919	0.127871	99
SER	70	100	0.140697	1.22137	0.115195	101
SER	71	100	0.158621	1.12763	0.140668	92
ASN	72	17.9	0.178206	1.14661	0.15542	85
SER	73	100	0.192701	0.527491	0.365317	23
ALA	74	0.8	0.209365	0.425979	0.491493	8
SER	75	100	0.209959	0.492589	0.426237	14
LEU	76	0	0.242517	0.488554	0.496398	7
THR	77	21.8	0.2095	0.664694	0.315182	35
ILE	78	0	0.225141	0.624945	0.360257	26
SER	79	100	0.178272	0.833915	0.213778	68
GLY	80	31.3	0.159393	0.676718	0.235539	56
LEU	81	2.9	0.199169	0.816415	0.243956	52
LYS	82	38.3	0.18011	0.921312	0.195493	75
THR	83	70.8	0.159993	0.859174	0.186217	77
GLU	84	57.1	0.166803	1.18405	0.140875	91
ASP	85	2.2	0.196829	0.528621	0.372345	22
GLU	86	38.7	0.186492	0.978773	0.190537	76
ALA	87	4.5	0.196699	0.427949	0.459633	12
ASP	88	30.4	0.20109	0.609677	0.329831	30
TYR	89	0	0.242654	0.415015	0.584689	3
TYR	90	21.2	0.224382	0.803016	0.279425	43
CYX	91	0.1	0.226451	0.384639	0.588735	2
GLN	92	2.3	0.215626	0.834147	0.258499	50
SER	93	100	0.200702	0.432588	0.463957	11
TYR	94	34.6	0.194419	0.841355	0.231078	58
ASP	95	6.9	0.169205	1.13675	0.148849	89
SER	96	100	0.139909	1.29462	0.108069	105
SER	97	100	0.141387	1.30327	0.108486	104
ASN	98	69.8	0.144442	1.48271	0.097417	106
HIS	99	57.1	0.1641	1.77783	0.0923039	108
VAL	100	55.5	0.174704	0.940752	0.185706	79
VAL	101	9.6	0.194388	0.710087	0.273752	47
PHE	102	48.3	0.1999	1.35856	0.147142	90
GLY	103	5.4	0.185166	0.667106	0.277566	45
GLY	104	75.9	0.175167	0.801669	0.218502	66
GLY	105	11.8	0.186875	0.574791	0.325118	32
THR	106	0.3	0.217496	0.405376	0.536528	5
LYS	107	34.6	0.199365	0.817869	0.243761	53
LEU	108	0	0.216829	0.622596	0.348266	28
THR	109	35.2	0.178081	0.626788	0.284116	42
VAL	110	14.2	0.177265	0.893114	0.198479	74
LEU	111	60.8	0.150672	3.02956	0.049734	111

## Sheet: 1FTG
Protein 1FTG		Solvent Access	Dynamical entropy	Movement restriction	SDRI	Residue ranking position
Residue		% RSA	Hi	RMSF (Å)	Hi*RMSFi-1
SER	1	100	0.122059	5.0012	0.024406	169
LYS	2	80.6	0.143609	3.54686	0.040489	168
LYS	3	52	0.158669	1.83192	0.0866133	162
ILE	4	1	0.182408	0.71693	0.254429	52
GLY	5	0	0.169418	0.478748	0.353878	20
LEU	6	0	0.200767	0.733657	0.273653	43
PHE	7	0.2	0.200959	0.750122	0.267902	47
TYR	8	6.7	0.19886	0.747001	0.266211	48
GLY	9	0	0.167893	0.697211	0.240807	63
THR	10	22.1	0.167728	0.914168	0.183476	92
GLN	11	59.3	0.150796	1.8191	0.0828962	163
THR	12	71.1	0.141885	1.28721	0.110226	154
GLY	13	29.4	0.139116	1.08912	0.127732	141
LYS	14	20.2	0.170195	1.3089	0.130029	138
THR	15	0.8	0.18348	0.896834	0.204587	78
GLU	16	32.3	0.165774	1.16348	0.142481	132
SER	17	100	0.156886	0.921246	0.170298	105
VAL	18	4.2	0.187707	0.750673	0.250051	56
ALA	19	0	0.174242	0.648966	0.268492	45
GLU	20	41.9	0.16105	1.08953	0.147817	126
ILE	21	38.9	0.174066	0.688134	0.252953	54
ILE	22	0.4	0.194217	0.650169	0.298717	38
ARG	23	28.5	0.171637	1.11782	0.153546	120
ASP	24	62.9	0.145437	1.24249	0.117053	149
GLU	25	32.5	0.156485	1.00683	0.155424	118
PHE	26	4.2	0.176108	1.01975	0.172697	102
GLY	27	21	0.132028	0.940626	0.140362	134
ASN	28	95.2	0.13032	1.71377	0.0760428	165
ASP	29	61.2	0.132366	1.36574	0.0969184	160
VAL	30	11	0.155835	1.04502	0.149123	123
VAL	31	2.5	0.173432	0.863899	0.200755	80
THR	32	21.6	0.162897	0.834845	0.195122	83
LEU	33	31.2	0.176508	0.901984	0.195688	82
HIS	34	21.5	0.176423	0.94335	0.187018	90
ASP	35	22.9	0.161132	1.10037	0.146434	129
VAL	36	5	0.178423	0.675572	0.264107	50
SER	37	100	0.145485	0.84771	0.171621	103
GLN	38	80.9	0.141524	1.41275	0.100176	158
ALA	39	23	0.149633	0.813061	0.184037	91
GLU	40	62.6	0.143141	1.23479	0.115924	150
VAL	41	8.2	0.155879	1.01262	0.153936	119
THR	42	55.5	0.138525	1.06386	0.13021	137
ASP	43	25.1	0.151826	1.1828	0.128362	140
LEU	44	0.7	0.180637	1.03038	0.17531	100
ASN	45	46.5	0.149702	1.2535	0.119427	146
ASP	46	74.9	0.143354	1.24221	0.115403	151
TYR	47	12.9	0.178107	0.719702	0.247473	59
GLN	48	47.5	0.160685	1.29633	0.123953	144
TYR	49	32	0.178149	0.783611	0.227343	70
LEU	50	0.2	0.200764	0.67419	0.297786	39
ILE	51	0	0.210042	0.450313	0.466435	5
ILE	52	0.4	0.214911	0.528168	0.406898	13
GLY	53	0	0.18617	0.395065	0.471239	2
CYS	54	0	0.201262	0.546821	0.368058	18
PRO	55	3.5	0.192244	0.553376	0.347401	22
THR	56	3.6	0.185176	0.481085	0.384913	16
TRP	57	18.7	0.185531	0.809582	0.229169	69
ASN	58	31.7	0.154627	1.23069	0.125642	142
ILE	59	73.7	0.147794	0.969493	0.152445	121
GLY	60	86.5	0.147408	0.756288	0.19491	85
GLU	61	61.2	0.158828	0.926157	0.171491	104
LEU	62	5.9	0.183186	0.736648	0.248675	58
GLN	63	5.7	0.180898	0.67487	0.268049	46
SER	64	100	0.147942	0.840855	0.175942	99
ASP	65	31.6	0.160916	0.847475	0.189877	88
TRP	66	0.4	0.207766	0.608163	0.341628	24
GLU	67	37.7	0.159017	0.983596	0.161669	114
GLY	68	50.9	0.136761	0.770301	0.177543	97
LEU	69	7.8	0.176117	0.910467	0.193436	86
TYR	70	25.6	0.17657	0.892455	0.197848	81
SER	71	100	0.138817	0.915302	0.151662	122
GLU	72	43.3	0.145259	1.12415	0.129216	139
LEU	73	0.4	0.171536	1.3771	0.124563	143
ASP	74	45.8	0.134561	2.20291	0.0610833	166
ASP	75	74.6	0.1301	2.48781	0.0522951	167
VAL	76	1.8	0.155759	1.40241	0.111066	153
ASP	77	54	0.142911	1.32333	0.107993	155
PHE	78	0.3	0.180051	0.874961	0.205782	77
ASN	79	62.1	0.138826	1.05904	0.131086	136
GLY	80	60.8	0.134311	0.833562	0.161129	115
LYS	81	4.3	0.175529	0.73859	0.237655	65
LEU	82	21.1	0.180462	0.661783	0.272691	44
VAL	83	0.8	0.19633	0.559841	0.350689	21
ALA	84	0	0.192324	0.411942	0.466871	4
TYR	85	0.5	0.219041	0.401786	0.545168	1
PHE	86	0.5	0.219589	0.46767	0.469539	3
GLY	87	0.4	0.185802	0.648759	0.286396	42
THR	88	1.7	0.194194	0.777764	0.249683	57
GLY	89	1.3	0.164982	0.506946	0.325442	30
ASP	90	15.6	0.159937	0.61231	0.261203	51
GLN	91	4.6	0.161993	0.774538	0.209148	75
ILE	92	64.9	0.142695	0.782616	0.182331	95
GLY	93	64.2	0.129493	0.664107	0.194988	84
TYR	94	25	0.166827	1.045	0.159643	116
ALA	95	22.6	0.142324	0.601188	0.236739	66
ASP	96	53.1	0.140433	0.838067	0.167567	108
ASN	97	20.1	0.160154	0.523095	0.306166	35
PHE	98	0.5	0.191101	0.519327	0.367978	19
GLN	99	0.5	0.20283	0.588132	0.344872	23
ASP	100	5.6	0.180323	0.45429	0.396934	14
ALA	101	3.9	0.185287	0.430681	0.43022	9
ILE	102	0.3	0.214391	0.463625	0.462423	7
GLY	103	0.2	0.169765	0.530425	0.320055	33
ILE	104	26.6	0.183153	0.563409	0.325079	31
LEU	105	0.2	0.199012	0.752926	0.264318	49
GLU	106	6.8	0.185491	0.646398	0.286961	41
GLU	107	62.7	0.161525	1.09224	0.147884	125
LYS	108	16.4	0.169851	1.02516	0.165683	110
ILE	109	1.8	0.187275	0.6268	0.298779	37
SER	110	100	0.156403	0.695942	0.224736	72
GLN	111	62.5	0.145889	1.4279	0.10217	157
ARG	112	25.6	0.158384	1.40629	0.112625	152
GLY	113	23.2	0.138362	0.732297	0.188942	89
GLY	114	12.6	0.151599	0.617807	0.245382	60
LYS	115	58.5	0.169982	1.01735	0.167083	109
THR	116	17.2	0.176717	0.526893	0.335394	27
VAL	117	9.4	0.185296	0.546848	0.338843	25
GLY	118	1.6	0.168	0.499976	0.336016	26
TYR	119	45	0.185635	0.741007	0.250517	55
TRP	120	16.3	0.194223	0.587183	0.33077	28
SER	121	100	0.152112	0.755901	0.201232	79
THR	122	21.7	0.154124	0.636377	0.24219	61
ASP	123	79.9	0.139177	1.18622	0.117328	148
GLY	124	51.2	0.130002	0.772304	0.16833	107
TYR	125	13.7	0.175756	0.781957	0.224765	71
ASP	126	64.4	0.13444	1.02254	0.131476	135
PHE	127	18.4	0.162553	0.687364	0.236488	67
ASN	128	66.1	0.132144	0.93214	0.141764	133
ASP	129	50.6	0.145023	0.791854	0.183143	93
SER	130	100	0.16026	0.494528	0.324066	32
LYS	131	52.1	0.171911	1.05103	0.163565	113
ALA	132	0	0.176081	0.468743	0.375646	17
LEU	133	24.9	0.171651	0.714123	0.240365	64
ARG	134	36.7	0.17678	0.747993	0.236339	68
ASN	135	85	0.133271	1.36412	0.0976977	159
GLY	136	49.2	0.130328	0.879214	0.148233	124
LYS	137	45	0.167663	0.988269	0.169654	106
PHE	138	0.2	0.193855	0.465751	0.416219	12
VAL	139	0	0.196434	0.446751	0.439694	8
GLY	140	0	0.179036	0.428417	0.4179	11
LEU	141	0.1	0.20772	0.446915	0.464786	6
ALA	142	0.2	0.183064	0.472074	0.387785	15
LEU	143	0.5	0.200637	0.608078	0.329952	29
ASP	144	0.1	0.171018	0.589993	0.289864	40
GLU	145	27.9	0.169743	0.961567	0.176527	98
ASP	146	55.5	0.143169	0.97545	0.146772	128
ASN	147	41.3	0.144757	0.760052	0.190457	87
GLN	148	15	0.157985	0.731037	0.216111	73
SER	149	100	0.143059	0.868921	0.164639	112
ASP	150	76.6	0.132361	1.12754	0.117388	147
LEU	151	36.6	0.155978	1.06028	0.147111	127
THR	152	4.2	0.167321	0.796071	0.210184	74
ASP	153	59.8	0.149946	0.822169	0.182379	94
ASP	154	67.1	0.147754	0.821953	0.179759	96
ARG	155	9.6	0.180626	0.709953	0.25442	53
ILE	156	1.9	0.187462	0.6058	0.309445	34
LYS	157	52.2	0.160905	1.10898	0.145093	130
SER	158	100	0.150336	0.721169	0.208461	76
TRP	159	0	0.205488	0.480708	0.42747	10
VAL	160	0.6	0.178227	0.588315	0.302944	36
ALA	161	50.7	0.145411	0.834534	0.174243	101
GLN	162	27	0.161346	1.52727	0.105643	156
LEU	163	0	0.187244	0.777444	0.240846	62
LYS	164	26.3	0.162808	1.02957	0.158133	117
SER	165	100	0.136864	0.947	0.144523	131
GLU	166	38.7	0.159012	1.29995	0.122322	145
PHE	167	3.3	0.180505	1.09407	0.164985	111
GLY	168	71.6	0.125806	1.37292	0.0916334	161
LEU	169	56.1	0.145499	1.87169	0.0777367	164

## Sheet: 1ARR
Protein 1ARR			Solvent Access	Dynamical entropy	Movement restriction	SDRI	Ranking whole structure	Chain A Residue ranking position
Residue		Chain	% RSA	Hi	RMSF (Å)	Hi*RMSFi-1
MET	1	A	77.4	0.120341	7.96552	0.0151078	106	53
LYS	2	A	80.3	0.121831	6.82007	0.0178635	105	52
GLY	3	A	70	0.112775	4.01087	0.0281173	102	51
MET	4	A	70.6	0.131403	4.04453	0.032489	100	50
SER	5	A	100	0.138782	3.08988	0.0449152	95	47
LYS	6	A	71.9	0.147641	3.44481	0.0428589	97	48
MET	7	A	85.5	0.180451	1.94706	0.0926789	69	31
PRO	8	A	77.1	0.176614	1.67823	0.105238	59	26
GLN	9	A	97.2	0.183482	2.01349	0.0911263	70	32
PHE	10	A	79.2	0.217617	1.86548	0.116655	54	24
ASN	11	A	72.3	0.187462	1.82663	0.102627	62	28
LEU	12	A	52.9	0.221168	1.56544	0.141282	40	17
ARG	13	A	77.6	0.196473	1.95725	0.100382	64	30
TRP	14	A	46.3	0.241656	1.24199	0.194572	12	5
PRO	15	A	58.1	0.19886	1.55642	0.127767	50	22
ARG	16	A	68.4	0.185124	2.32102	0.0797597	78	38
GLU	17	A	71.7	0.177317	2.19069	0.0809413	76	36
VAL	18	A	42	0.213061	1.4279	0.149213	30	9
LEU	19	A	29.7	0.216872	1.4839	0.14615	37	14
ASP	20	A	41	0.180516	1.74242	0.1036	60	27
LEU	21	A	59.3	0.206489	1.44761	0.142641	39	16
VAL	22	A	15.5	0.220727	1.27431	0.173212	20	6
ARG	23	A	47.5	0.197228	2.28979	0.0861338	74	34
LYS	24	A	63.7	0.184618	1.83162	0.100795	63	29
VAL	25	A	30.8	0.199815	1.34314	0.148767	32	11
ALA	26	A	0.2	0.185281	1.3958	0.132742	46	20
GLU	27	A	69.9	0.166816	2.07089	0.080553	77	37
GLU	28	A	76.6	0.162841	2.07025	0.0786578	79	39
ASN	29	A	44.3	0.174365	1.9249	0.0905838	71	33
GLY	30	A	81.4	0.147029	1.87514	0.0784095	80	40
ARG	31	A	34	0.207728	1.51933	0.136723	44	18
SER	32	A	100	0.185056	1.624	0.113951	56	25
VAL	33	A	37.8	0.215249	1.45169	0.148275	33	12
ASN	34	A	79.7	0.21167	1.43711	0.147288	35	13
SER	35	A	100	0.199015	1.33558	0.14901	31	10
GLU	36	A	11.6	0.224469	1.08048	0.20775	9	4
ILE	37	A	28	0.244447	0.984122	0.24839	5	1
TYR	38	A	63.2	0.225953	1.37176	0.164718	23	7
GLN	39	A	23	0.207867	1.44277	0.144075	38	15
ARG	40	A	42.5	0.233765	1.0311	0.226714	8	3
VAL	41	A	47.9	0.232068	0.937374	0.247573	6	2
MET	42	A	44.9	0.211645	1.6294	0.129891	47	21
GLU	43	A	51.2	0.191873	1.58533	0.12103	53	23
SER	44	A	100	0.192987	1.27465	0.151404	29	8
PHE	45	A	45.7	0.214767	1.58845	0.135205	45	19
LYS	46	A	80.7	0.177852	2.17506	0.0817687	75	35
LYS	47	A	61.2	0.173078	2.68649	0.0644252	86	43
GLU	48	A	77	0.139841	3.50609	0.0398852	99	49
GLY	49	A	67.9	0.131125	2.8625	0.0458079	94	46
ARG	50	A	83.7	0.164643	2.92059	0.0563732	90	45
ILE	51	A	39.5	0.190138	2.90981	0.0653437	85	42
GLY	52	A	41.5	0.167648	2.38971	0.0701541	83	41
ALA	53	A	96.5	0.160834	2.69219	0.0597408	89	44
MET	54	B	75.7	0.156387	8.67593	0.0180254	104
LYS	55	B	80.4	0.142241	7.46934	0.0190434	103
GLY	56	B	68.8	0.140484	4.64905	0.0302177	101
MET	57	B	71.5	0.182835	4.30058	0.042514	98
SER	58	B	100	0.146743	3.14	0.0467336	93
LYS	59	B	67.6	0.154977	2.98754	0.0518745	91
MET	60	B	86.5	0.191825	1.50125	0.127777	49
PRO	61	B	70.2	0.178651	1.28496	0.139032	42
GLN	62	B	98.3	0.179249	1.56482	0.114549	55
PHE	63	B	77.5	0.221367	1.45644	0.151991	28
ASN	64	B	75.9	0.195343	1.39036	0.140498	41
LEU	65	B	60	0.227441	1.15482	0.196949	10
ARG	66	B	81.1	0.197273	1.61119	0.122439	52
TRP	67	B	42.3	0.237592	1.0262	0.231527	7
PRO	68	B	59.7	0.186891	1.26316	0.147956	34
ARG	69	B	72.5	0.188632	2.03451	0.0927164	68
GLU	70	B	71.9	0.171453	1.94824	0.0880036	73
VAL	71	B	44.8	0.206817	1.23491	0.167475	21
LEU	72	B	28.4	0.214496	1.35623	0.158156	26
ASP	73	B	38.2	0.18244	1.4551	0.12538	51
LEU	74	B	55.8	0.208718	1.30024	0.160523	25
VAL	75	B	19.6	0.22317	1.15304	0.19355	14
ARG	76	B	51.5	0.197448	2.07321	0.0952377	66
LYS	77	B	63.3	0.186812	1.68892	0.11061	57
VAL	78	B	34.5	0.20777	1.19382	0.174038	19
ALA	79	B	0.7	0.19151	1.09118	0.175507	18
GLU	80	B	71.7	0.17278	1.73084	0.0998246	65
GLU	81	B	81.3	0.17224	1.84975	0.093115	67
ASN	82	B	37.8	0.17648	1.64945	0.106994	58
GLY	83	B	82.5	0.150982	1.47108	0.102633	61
ARG	84	B	28.4	0.213921	1.21015	0.176772	17
SER	85	B	100	0.189149	1.24313	0.152155	27
VAL	86	B	35.7	0.217468	1.14369	0.190146	15
ASN	87	B	80.5	0.2137	1.09508	0.195146	11
SER	88	B	100	0.203157	1.04878	0.193707	13
GLU	89	B	11.7	0.228737	0.887134	0.257838	3
ILE	90	B	31.2	0.244639	0.814755	0.30026	1
TYR	91	B	62.5	0.228165	1.21308	0.188087	16
GLN	92	B	25.7	0.212011	1.28121	0.165478	22
ARG	93	B	37.1	0.235796	0.938752	0.25118	4
VAL	94	B	45.2	0.23209	0.849449	0.273224	2
MET	95	B	44.7	0.211856	1.53057	0.138416	43
FLU	96	B	51.6	0.193988	1.50481	0.128912	48
SER	97	B	100	0.195109	1.20693	0.161657	24
PHE	98	B	50.8	0.214747	1.46604	0.146481	36
LYS	99	B	74.7	0.177916	1.99864	0.0890186	72
LYS	100	B	64.2	0.172713	2.4351	0.0709264	82
GLU	101	B	75.1	0.139609	3.25702	0.042864	96
GLY	102	B	37.7	0.134413	2.62996	0.0511084	92
ARG	103	B	80.7	0.168504	2.64406	0.0637291	88
ILE	104	B	47.7	0.170921	2.68044	0.0637659	87
GLY	105	B	56.7	0.161543	2.15864	0.0748355	81
ALA	106	B	84.4	0.170083	2.51843	0.0675354	84

## Sheet: 1HCQ
Protein 1HCQ			Solvent Access	Dynamical entropy	Movement restriction	SDRI	Ranking Whole structure	Ranking Dimer structure	Ranking Chain A
Residue		Chain	% RSA	Hi	RMSF (Å)	Hi*RMSFi-1
MET	1	A	100	0.114277	7.9932	0.0142968	184	148	74
LYS	2	A	63.6	0.114138	7.41326	0.0153965	182	146	73
GLU	3	A	95.1	0.117653	5.09664	0.0230845	180	144	72
THR	4	A	35.6	0.124166	4.05726	0.0306035	173	141	71
ARG	5	A	43.4	0.143596	3.95505	0.036307	168	136	68
TYR	6	A	44.8	0.152943	3.15392	0.0484929	145	117	58
CYS	7	A	1.6	0.169315	2.54179	0.0666127	88	67	34
ALA	8	A	34	0.156679	2.90087	0.0540112	128	101	50
VAL	9	A	0	0.185328	2.7567	0.0672282	84	63	30
CYS	10	A	1.2	0.176712	2.4404	0.072411	65	47	22
ASN	11	A	65.9	0.162064	2.79184	0.058049	116	91	45
ASP	12	A	19.9	0.163933	2.39316	0.0685007	82	62	29
TYR	13	A	62.3	0.153081	3.04066	0.0503445	138	111	54
ALA	14	A	20.2	0.147247	2.70795	0.0543756	126	100	49
SER	15	A	100	0.138906	2.90805	0.0477662	146	118	59
GLY	16	A	15.5	0.134007	2.75294	0.0486776	144	116	57
TYR	17	A	62	0.145506	3.40409	0.0427445	157	127	63
HIS	18	A	18.6	0.156453	3.10982	0.0503094	139	112	55
TYR	19	A	30.8	0.16335	2.7238	0.0599714	109	85	43
GLY	20	A	37.7	0.127766	3.09886	0.0412301	161	130	64
VAL	21	A	6.1	0.157993	2.96506	0.053285	131	104	52
TRP	22	A	37.9	0.158244	3.04392	0.051987	136	109	53
SER	23	A	0	0.164655	2.45754	0.0669998	85	64	31
CYS	24	A	3.5	0.173971	2.14324	0.0811717	43	30	16
GLU	25	A	51.4	0.165799	1.9303	0.0858926	36	23	12
GLY	26	A	30.9	0.163812	1.78056	0.0920003	24	13	7
CYS	27	A	0	0.183357	1.99486	0.0919146	25	14	8
LYS	28	A	31.4	0.176541	2.3866	0.0739719	58	41	20
ALA	29	A	23.8	0.164046	1.6623	0.0986865	12	6	2
PHE	30	A	3.2	0.195565	1.83554	0.106544	6	2	1
PHE	31	A	0.7	0.181359	2.25914	0.0802776	44	31	17
LYS	32	A	43.7	0.164419	2.129	0.0772285	51	36	18
ARG	33	A	52.4	0.173968	2.01189	0.0864702	33	21	11
SER	34	A	100	0.161778	1.94222	0.0832951	41	28	15
ILE	35	A	34	0.157671	2.46278	0.0640217	94	72	38
GLN	36	A	73.1	0.143217	2.6678	0.0536835	129	102	51
GLY	37	A	47.7	0.136413	2.04535	0.0666942	87	66	33
HIS	38	A	94.1	0.176285	1.95781	0.0900418	30	19	10
ASN	39	A	44.9	0.158809	2.38618	0.0665536	89	68	35
ASP	40	A	77.1	0.155377	2.55757	0.060752	108	84	42
TYR	41	A	25.9	0.190462	2.01999	0.0942886	18	9	4
MET	42	A	75.1	0.179546	2.49014	0.0721027	66	48	23
CYS	43	A	22.3	0.180396	2.4623	0.0732632	62	45	21
PRO	44	A	71.5	0.186739	2.41896	0.077198	52	37	19
ALA	45	A	60.4	0.164539	2.9182	0.0563839	119	94	47
THR	46	A	65.5	0.154274	3.58561	0.0430258	156	126	62
ASN	47	A	56.3	0.162987	3.30689	0.0492871	141	114	56
GLN	48	A	75.1	0.160938	3.5634	0.0451641	150	122	61
CYS	49	A	27.6	0.178003	2.81435	0.0632484	97	75	40
THR	50	A	53	0.169544	3.03225	0.0559137	120	95	48
ILE	51	A	7.7	0.191315	2.65588	0.0720345	67	49	24
ASP	52	A	24.3	0.175551	2.63122	0.0667185	86	65	32
LYS	53	A	50.2	0.178164	2.77099	0.0642963	93	71	37
ASN	54	A	79.4	0.174422	2.6375	0.0661316	91	70	36
ARG	55	A	48.7	0.193691	2.7423	0.0706308	73	55	26
ARG	56	A	14.1	0.202613	2.15473	0.0940317	19	10	5
LYS	57	A	70.9	0.197293	2.16549	0.0911082	27	16	9
SER	58	A	100	0.185871	2.19166	0.0848081	37	24	13
CYS	59	A	2.3	0.191768	2.26728	0.0845806	39	26	14
GLN	60	A	44.8	0.19868	2.03835	0.0974709	13	7	3
ALA	61	A	19.2	0.173716	2.43754	0.071267	70	52	25
CYS	62	A	0.6	0.1799	2.60484	0.0690638	80	60	28
ARG	63	A	7.5	0.206613	2.22594	0.0928209	22	11	6
LEU	64	A	13.9	0.184642	2.64165	0.0698964	77	58	27
ARG	65	A	30.1	0.176079	3.12084	0.0564205	118	93	46
LYS	66	A	25.2	0.179788	3.06519	0.0586547	114	89	44
CYS	67	A	0	0.170204	2.78541	0.0611054	106	83	41
TYR	68	A	53.7	0.158471	3.97704	0.0398464	164	133	66
GLU	69	A	67.2	0.145197	3.62901	0.04001	163	132	65
VAL	70	A	38.6	0.154867	3.26109	0.0474894	147	119	60
GLY	71	A	31.4	0.130586	3.30744	0.0394824	166	135	67
MET	72	A	5.4	0.173975	2.74151	0.0634596	96	74	39
MET	73	A	65.5	0.142329	3.92892	0.0362258	169	137	69
LYS	74	A	91.1	0.140718	4.05803	0.0346764	171	139	70
MET	75	B	100	0.114598	7.93839	0.0144359	183	147
LYS	76	B	87.1	0.114047	7.38073	0.015452	181	145
GLU	77	B	83.7	0.115656	4.5962	0.0251634	178	143
THR	78	B	50.8	0.126344	3.97017	0.0318233	172	140
ARG	79	B	40.6	0.139358	3.50367	0.0397749	165	134
TYR	80	B	49.6	0.155099	2.9279	0.0529729	132	105
CYS	81	B	1.2	0.171408	2.31986	0.0738874	59	42
ALA	82	B	30.1	0.158789	2.68173	0.0592112	113	88
VAL	83	B	0.1	0.187373	2.4756	0.0756878	53	38
CYS	84	B	3.6	0.17888	2.24262	0.0797638	46	33
ASN	85	B	59.5	0.160034	2.54563	0.0628661	99	77
ASP	86	B	20	0.163786	2.20439	0.0742997	56	40
TYR	87	B	62	0.15311	2.68148	0.057099	117	92
ALA	88	B	22.5	0.147284	2.40415	0.0612624	104	81
SER	89	B	100	0.145156	2.27199	0.0638895	95	73
GLY	90	B	14.9	0.13369	2.50457	0.0533785	130	103
TYR	91	B	61.8	0.143232	3.2035	0.0447112	152	124
HIS	92	B	17.9	0.153972	2.59619	0.0593068	112	87
TYR	93	B	31	0.161077	2.93532	0.0548754	124	98
GLY	94	B	45.6	0.127608	3.05911	0.0417142	160	129
VAL	95	B	5.7	0.157857	2.88909	0.0546391	125	99
TRP	96	B	35.8	0.158208	2.87559	0.0550176	123	97
SER	97	B	16.7	0.164405	2.33509	0.0704063	74	56
CYX	98	B	2	0.173891	2.01819	0.0861619	34	22
GLU	99	B	51.1	0.165873	1.95795	0.0847175	38	25
GLY	100	B	30.9	0.163804	1.80462	0.0907692	28	17
CYX	101	B	0	0.183164	1.99588	0.0917711	26	15
LYS	102	B	29.3	0.178481	2.25854	0.0790251	48	34
ALA	103	B	20.1	0.163964	1.99304	0.082268	42	29
PHE	104	B	3.6	0.195451	2.02233	0.0966466	16	8
PHE	105	B	1.8	0.176845	2.55705	0.0691596	79	59
LYS	106	B	42.6	0.164387	2.60755	0.0630427	98	76
ARG	107	B	54	0.182794	2.03555	0.0898009	31	20
SER	108	B	100	0.157827	2.52566	0.0624895	101	78
ILE	109	B	46	0.151298	3.07482	0.0492054	142	115
GLN	110	B	69.3	0.145341	3.10678	0.0467819	149	121
GLY	111	B	65.2	0.127977	3.01503	0.0424463	158	128
HIS	112	B	38.5	0.161248	2.75676	0.0584917	115	90
ASN	113	B	82.3	0.155473	2.97474	0.0522642	134	107
ASP	114	B	82.3	0.153157	2.90841	0.0526601	133	106
TYR	115	B	27.4	0.188189	2.24977	0.083648	40	27
MET	116	B	74.6	0.183985	2.61408	0.0703823	75	57
CYS	117	B	14.6	0.180521	2.51755	0.0717049	68	50
PRO	118	B	73.3	0.188958	2.56073	0.0737906	60	43
ALA	119	B	59.1	0.164595	2.98465	0.0551472	122	96
THR	120	B	63.7	0.154355	3.2978	0.0468054	148	120
ASN	121	B	60.1	0.163119	3.27972	0.0497358	140	113
GLN	122	B	70.2	0.165274	3.16655	0.0521937	135	108
CYS	123	B	29.4	0.178063	2.5973	0.0685568	81	61
THR	124	B	61.4	0.169533	2.82724	0.0599641	110	86
ILE	125	B	12.3	0.191276	2.43245	0.0786351	49	35
ASP	126	B	20.5	0.173479	2.36687	0.0732944	61	44
LYS	127	B	47.1	0.174077	2.44766	0.0711198	71	53
ASN	128	B	63.5	0.172402	2.36565	0.0728772	63	46
ARG	129	B	51.1	0.191561	2.38995	0.0801527	45	32
ARG	130	B	11.9	0.202585	1.86651	0.108537	4	1
LYS	131	B	68.5	0.19527	1.9115	0.102156	8	4
SER	132	B	100	0.185918	2.01812	0.0921242	23	12
CYS	133	B	2.5	0.191756	2.12222	0.0903562	29	18
GLN	134	B	43.9	0.198919	1.92009	0.103599	7	3
ALA	135	B	18	0.173799	2.43513	0.0713719	69	51
CYS	136	B	0.1	0.182241	2.45	0.0743841	55	39
ARG	137	B	8.8	0.206656	2.04797	0.100908	10	5
LEU	138	B	9	0.182537	2.57831	0.0707973	72	54
ARG	139	B	32.3	0.176151	2.87969	0.06117	105	82
LYS	140	B	27.4	0.181924	2.73642	0.0664824	90	69
CYS	141	B	0	0.170101	2.73856	0.0621133	102	79
TYR	142	B	52.5	0.162624	3.6603	0.0444292	154	125
GLU	143	B	71.8	0.147414	3.29076	0.0447964	151	123
VAL	144	B	34.3	0.154867	3.06388	0.0505459	137	110
GLY	145	B	32.5	0.130551	3.22903	0.0404303	162	131
MET	146	B	3.2	0.171604	2.77285	0.0618872	103	80
MET	147	B	66.2	0.137785	3.84528	0.0358323	170	138
LYS	148	B	98.8	0.140681	4.68739	0.0300126	175	142
DC	149	C		0.100967	3.31003	0.0305033	174
DC	150	C		0.113663	2.54683	0.0446293	153
DA	151	C		0.126875	1.81301	0.0699803	76
DG	152	C		0.131647	1.75047	0.0752067	54
DG	153	C		0.132103	1.81511	0.0727796	64
DT	154	C		0.132417	1.52203	0.0870001	32
DC	155	C		0.132711	1.67588	0.0791891	47
DA	156	C		0.144194	2.4183	0.0596263	111
DC	157	C		0.14895	1.72931	0.0861323	35
DA	158	C		0.177937	1.63982	0.10851	5
DG	159	C		0.186747	1.6609	0.112438	2
DT	160	C		0.183874	1.46672	0.125364	1
DG	161	C		0.178881	1.60161	0.111688	3
DA	162	C		0.163215	1.68237	0.0970151	14
DC	163	C		0.13863	1.87169	0.0740665	57
DC	164	C		0.122897	1.8607	0.0660487	92
DT	165	C		0.113859	2.587	0.0440119	155
DG	166	C		0.10318	3.74464	0.0275541	177
DC	167	D		0.0966254	3.8617	0.0250214	179
DC	168	D		0.109289	2.92558	0.0373563	167
DA	169	D		0.122494	2.4937	0.0491211	143
DG	170	D		0.131571	2.42904	0.0541658	127
DG	171	D		0.138571	2.27197	0.0609915	107
DT	172	D		0.143578	2.07205	0.0692928	78
DC	173	D		0.137379	2.1865	0.0628305	100
DA	174	D		0.141856	2.1033	0.0674445	83
DC	175	D		0.150754	1.61264	0.0934827	21
DT	176	D		0.15984	1.56703	0.102002	9
DG	177	D		0.175389	1.869	0.0938416	20
DT	178	D		0.184141	1.9	0.0969162	15
DG	179	D		0.178841	1.89192	0.0945285	17
DA	180	D		0.167373	1.69465	0.0987654	11
DC	181	D		0.149407	1.93167	0.0773458	50
DC	182	D		0.131676	2.35582	0.055894	121
DT	183	D		0.120351	2.85094	0.0422143	159
DG	184	D		0.109662	3.66219	0.0299444	176

## Sheet: 1CSP
Protein 1CSP		Solvent Access	Dynamical entropy	Movement restriction	SDRI	Residue ranking position
Residue		% RSA	Hi	RMSF (Å)	Hi*RMSFi-1
MET	1	72.2	0.197288	1.08791	0.181346	47
LEU	2	34.7	0.215017	0.934002	0.230211	41
GLU	3	39.2	0.204446	1.20032	0.170326	48
GLY	4	12.2	0.238159	0.490058	0.485982	7
LYS	5	45.9	0.222181	0.958081	0.231903	40
VAL	6	2.5	0.249961	0.398925	0.626585	3
LYS	7	36.1	0.215895	0.647636	0.333359	25
TRP	8	39	0.217633	0.545559	0.398918	19
PHE	9	13.4	0.240621	0.544791	0.441676	14
ASN	10	33	0.202953	0.701737	0.289215	28
SER	11	100	0.196132	1.04774	0.187195	46
GLU	12	99	0.162665	1.45165	0.112055	59
LYS	13	63.7	0.182032	1.18305	0.153867	51
GLY	14	7.7	0.221298	0.650612	0.340139	23
PHE	15	26	0.221603	0.869898	0.254746	30
GLY	16	0	0.254362	0.404844	0.628297	2
PHE	17	28.7	0.240583	0.500695	0.480498	8
ILE	18	0	0.263521	0.480113	0.548872	5
GLU	19	47.9	0.220458	0.915482	0.24081	32
VAL	20	8.9	0.221877	0.944578	0.234896	37
GLU	21	77.4	0.175601	2.07574	0.0845968	63
GLY	22	90.1	0.169188	1.7185	0.0984511	61
GLN	23	56.2	0.188966	1.63339	0.115689	58
ASP	24	75.7	0.191719	1.3075	0.14663	54
ASP	25	41	0.215338	0.909734	0.236705	35
VAL	26	5.4	0.25006	0.713012	0.35071	22
PHE	27	33.4	0.244441	0.561368	0.435439	16
VAL	28	0	0.268731	0.424768	0.632652	1
HIS	29	31.1	0.229942	0.596036	0.385786	20
PHE	30	40.4	0.216603	0.909872	0.238059	34
SER	31	100	0.216836	0.610491	0.355183	21
ALA	32	10.1	0.24572	0.547993	0.4484	13
ILE	33	4.6	0.245724	0.559621	0.43909	15
GLN	34	41.3	0.211546	1.0482	0.201819	45
GLY	35	63.5	0.191172	1.25082	0.152837	52
GLU	36	88.7	0.160676	2.65449	0.0605298	66
GLY	37	60.7	0.169456	1.85447	0.0913771	62
PHE	38	75.6	0.177703	1.70814	0.104034	60
LYS	39	35.6	0.211081	0.931588	0.226582	42
THR	40	22.4	0.217434	0.672969	0.323097	27
LEU	41	5.2	0.24513	0.567693	0.4318	17
GLU	42	66.6	0.203172	1.25479	0.161917	50
GLU	43	76.2	0.195781	1.18541	0.165159	49
GLY	44	42.5	0.207333	0.614912	0.337176	24
GLN	45	19.7	0.22386	1.06504	0.210189	44
ALA	46	15.9	0.225041	0.497243	0.452577	12
VAL	47	0	0.254409	0.452013	0.562835	4
SER	48	100	0.235992	0.590406	0.399711	18
PHE	49	0	0.253186	0.549271	0.46095	11
GLU	50	39.5	0.213093	0.752809	0.283064	29
ILE	51	32.4	0.218985	0.944121	0.231946	39
VAL	52	51.8	0.209227	0.853671	0.245091	31
GLU	53	70	0.17851	1.5343	0.116346	57
GLY	54	58.6	0.189742	1.27042	0.149354	53
ASN	55	100	0.169842	2.13524	0.0795427	64
ARG	56	96	0.178177	2.8574	0.0623564	65
GLY	57	26.3	0.198822	1.3776	0.144325	55
PRO	58	54.2	0.217649	0.924447	0.235437	36
GLN	59	44.5	0.23458	1.04283	0.224947	43
ALA	60	4	0.260731	0.551862	0.472456	10
ALA	61	18.3	0.243563	0.512827	0.474941	9
ASN	62	42.8	0.220603	0.916401	0.240728	33
VAL	63	0.1	0.258984	0.476775	0.5432	6
THR	64	38.8	0.229438	0.703903	0.325951	26
LYS	65	45.5	0.218013	0.935518	0.23304	38
GLU	66	52.7	0.195311	1.61599	0.120862	56
ALA	67	100	0.167574	2.92264	0.0573366	67

## Sheet: 1C9O
Protein 1C9O		Solvent Access	Dynamical entropy	Movement restriction	SDRI	Residue ranking position
Residue		% RSA	Hi	RMSF (Å)	Hi*RMSFi-1
MET	1	70	0.194982	0.961291	0.202834	46
GLN	2	36.9	0.209303	0.771018	0.271464	35
ARG	3	65.8	0.205119	0.77059	0.266184	37
GLY	4	4.8	0.242165	0.405124	0.597756	7
LYS	5	33.1	0.223068	1.08202	0.206158	45
VAL	6	1.8	0.247413	0.409181	0.604655	6
LYS	7	37.8	0.215253	0.673511	0.319598	31
TRP	8	39.7	0.216866	0.558041	0.388619	19
PHE	9	14.7	0.23986	0.606979	0.395171	17
ASN	10	31	0.200726	0.702659	0.285666	33
ASN	11	49.3	0.192424	1.2601	0.152705	56
GLU	12	90.4	0.162225	1.32473	0.122459	61
LYS	13	57.7	0.181316	1.13512	0.159732	53
GLY	14	6.8	0.22065	0.597406	0.369348	20
TYR	15	30.3	0.217362	0.670426	0.324215	28
GLY	16	0	0.253588	0.385479	0.657851	2
PHE	17	28.1	0.241588	0.533287	0.453017	13
ILE	18	0	0.266248	0.405698	0.656271	3
GLU	19	45.8	0.221485	0.845267	0.262029	39
VAL	20	18.1	0.229362	0.58512	0.391992	18
GLU	21	91.4	0.194063	1.28486	0.151038	57
GLY	22	100	0.176876	1.27117	0.139144	59
GLY	23	45.9	0.193665	0.909708	0.212887	44
SER	24	100	0.200686	1.06118	0.189115	48
ASP	25	41.9	0.216127	0.759841	0.284437	34
VAL	26	7	0.250901	0.451619	0.555559	11
PHE	27	28.3	0.245187	0.47605	0.515045	12
VAL	28	0	0.267803	0.386864	0.692239	1
HIS	29	33.3	0.229118	0.544113	0.421085	16
PHE	30	40.4	0.21413	0.851416	0.251499	42
THR	31	68.7	0.212742	0.615808	0.345468	24
ALA	32	11.3	0.243381	0.549462	0.442944	15
ILE	33	5.8	0.24349	0.71585	0.340141	25
GLN	34	45.7	0.209177	1.30287	0.160551	52
GLY	35	66.8	0.195828	1.3499	0.145069	58
GLU	36	98.9	0.162145	2.54538	0.0637018	65
GLY	37	53.7	0.169081	2.19407	0.0770629	64
PHE	38	72.9	0.194771	3.23036	0.0602939	66
LYS	39	31.6	0.19689	2.27134	0.0866845	63
THR	40	21.1	0.218251	1.10435	0.197628	47
LEU	41	2.7	0.244291	0.662723	0.368616	21
GLU	42	68.4	0.202646	1.27797	0.158569	54
GLU	43	77.5	0.193541	1.2468	0.15523	55
GLY	44	55.4	0.208425	0.634748	0.328358	27
GLN	45	29.5	0.223431	0.832991	0.268228	36
GLU	46	33.3	0.208692	0.824643	0.25307	40
VAL	47	0	0.252144	0.415271	0.60718	5
SER	48	100	0.235365	0.529072	0.444865	14
PHE	49	0	0.254235	0.407869	0.623325	4
GLU	50	37.6	0.212457	0.657315	0.32322	29
ILE	51	50.3	0.22002	0.616558	0.356853	23
VAL	52	39	0.210356	0.672927	0.312599	32
GLN	53	90.6	0.184069	1.13946	0.161541	51
GLY	54	40.7	0.190181	0.811702	0.234299	43
ASN	55	98.4	0.172758	1.3217	0.130709	60
ARG	56	87.4	0.193233	1.68035	0.114996	62
GLY	57	23.9	0.200781	0.758472	0.264718	38
PRO	58	60.6	0.214938	0.652369	0.329472	26
GLN	59	35	0.236916	0.650614	0.364142	22
ALA	60	8.3	0.261789	0.441884	0.592438	8
ALA	61	22.6	0.242849	0.424335	0.572304	10
ASN	62	35.6	0.218169	0.864116	0.252477	41
VAL	63	0	0.258184	0.437833	0.589686	9
VAL	64	37.5	0.227094	0.709238	0.320195	30
LYS	65	40.5	0.211816	1.24927	0.169552	50
LEU	66	62.1	0.19508	1.03318	0.188815	49

## Sheet: 2N34
Protein 2N34		Solvent Access	Dynamical entropy	Movement restriction Main Chain	SDRI	Residue ranking position
Residue		% RSA	Hi	RMSF (Å)	Hi*RMSFi-1
ARG	1	100	0.0906959	12.2761	0.007388	70
SER	2	100	0.0896615	11.5143	0.00778694	69
LEU	3	76.5	0.103955	10.2153	0.0101764	68
ARG	4	80.9	0.123305	9.38191	0.0131428	67
GLN	5	86.6	0.12911	9.05628	0.0142564	66
ARG	6	89.1	0.142011	8.80715	0.0161246	64
LEU	7	64.1	0.148489	6.94164	0.021391	55
GLN	8	75.1	0.15516	5.00642	0.0309922	37
ASP	9	68.6	0.151192	3.21731	0.0469935	30
THR	10	85.7	0.153242	5.32535	0.0287759	41
VAL	11	79.2	0.161443	7.52782	0.0214462	54
GLY	12	56.6	0.148374	9.8515	0.0150611	65
LEU	13	87.9	0.168766	7.82806	0.0215592	53
CYS	14	84	0.161433	5.64627	0.0285911	42
PHE	15	80.3	0.170122	3.4085	0.0499112	29
PRO	16	60.9	0.164881	6.19716	0.0266058	47
MET	17	78.5	0.165423	8.88452	0.0186192	61
ARG	18	78.7	0.170647	10.3633	0.0164664	62
THR	19	74.9	0.170394	8.3954	0.0202961	56
TYR	20	76.6	0.176462	6.91859	0.0255055	50
SER	21	100	0.16643	7.30119	0.0227949	52
LYS	22	93	0.180353	8.93949	0.0201748	58
GLN	23	89.2	0.179516	9.15407	0.0196105	59
SER	24	100	0.17027	8.4008	0.0202683	57
LYS	25	90.3	0.190547	7.29897	0.026106	49
PRO	26	76.2	0.182179	6.967	0.0261489	48
LEU	27	82	0.19598	6.52764	0.0300231	39
PHE	28	85	0.195425	6.03895	0.0323607	35
SER	29	100	0.188251	6.44572	0.0292057	40
ASN	30	68.6	0.198102	7.26476	0.0272688	45
LYS	31	66.5	0.21149	7.5913	0.0278595	43
ARG	32	93.4	0.213867	7.72701	0.0276779	44
LYS	33	68.3	0.218487	8.19525	0.0266602	46
ILE	34	54.7	0.233628	7.3318	0.031865	36
HIS	35	69.4	0.235598	5.43358	0.0433596	31
LEU	36	96	0.223594	2.81731	0.0793643	26
SER	37	100	0.222126	1.96755	0.112895	18
GLU	38	40.8	0.24772	1.91767	0.129177	17
LEU	39	59.6	0.253989	2.55614	0.0993643	21
MET	40	47.8	0.254532	3.21921	0.0790667	27
LEU	41	81.5	0.26263	3.28321	0.0799917	25
GLU	42	79.7	0.230995	2.31675	0.0997065	20
LYS	43	61.2	0.243843	1.23356	0.197673	13
CYS	44	55.6	0.240785	0.578935	0.415909	3
PRO	45	68.9	0.225194	1.03504	0.21757	11
PHE	46	37	0.254607	1.4152	0.179909	14
PRO	47	51	0.212956	1.94991	0.109213	19
ALA	48	92	0.195466	2.10275	0.0929571	23
GLY	49	94.5	0.185621	1.92481	0.0964358	22
SER	50	100	0.214496	1.44638	0.148298	15
ASP	51	68.8	0.211415	0.810955	0.260699	9
LEU	52	58.5	0.24145	0.655563	0.36831	4
ALA	53	12.6	0.243035	0.690995	0.351718	6
GLN	54	66.6	0.234924	0.738617	0.318059	7
LYS	55	63.2	0.240103	0.663867	0.361673	5
TRP	56	16.4	0.285724	0.570747	0.500614	1
HIS	57	64.4	0.255561	0.596852	0.428182	2
LEU	58	65.9	0.243466	0.791217	0.307711	8
ILE	59	50.7	0.260404	1.00144	0.260028	10
LYS	60	45.3	0.269077	1.30153	0.206739	12
GLN	61	35.5	0.261306	1.95308	0.133792	16
HIS	62	83	0.246285	2.9786	0.0826851	24
THR	63	71.3	0.2433	4.71054	0.05165	28
ALA	64	26.2	0.226551	5.93935	0.0381441	32
PRO	65	89.7	0.221763	6.44813	0.0343918	34
VAL	66	58	0.219428	6.16264	0.0356061	33
SER	67	100	0.198692	6.52337	0.0304585	38
PRO	68	88.9	0.192964	7.88688	0.0244664	51
HIS	69	95.2	0.183458	9.37459	0.0195697	60
SER	70	100	0.164662	10.1629	0.0162022	63
